# Supplementary material for: RNA-Seq Reveals the Underlying Molecular Mechanism of First Cleavage Time Affecting Porcine Embryo Development
Source: MDPI journal article supplement (doi:10.3390/genes13071251), 2022-07-15
Supplement: s1 [file s1]

**Supplementary Materials:**

Table S1. The primers used in PA embryos for qRT-PCR

| Name of primer | Gene symbol                            | Sequence of primer (5'-3') | Tm (°C) | Fragment size (bp) |
|----------------|----------------------------------------|----------------------------|---------|--------------------|
| 18S -F         | 18S ribosomal RNA                      | GGACCTGACCGACTACCTCA       | 58      | 134                |
| 18S -R         |                                        | CCATCTCCTGCTCGAAGTCC       |         |                    |
| SOX2 -F        | SRY-Box Transcription Factor 2         | ACCAGAAGAACAGCCCAG         | 55      | 159                |
| SOX2 -R        |                                        | CCGTCTCCGACAAAAGTT         |         |                    |
| OCT4 -F        | POU Class 5 Homeobox 1                 | GTGTTTCAGCCAAACGACCAT      | 55      | 200                |
| OCT4 -R        |                                        | TTGCCTCTCACTCGGTTCTC       |         |                    |
| KLF4 -F        | Kruppel Like Factor 4                  | TCCCACCGCTCCATTAC          | 55      | 162                |
| KLF4 -R        |                                        | ATGAGAACTCTTCGTGTAGG       |         |                    |
| BCL-XL -F      | BCL2 Like 1                            | ACTGAATCAGAAGCGGAAAC       | 60      | 249                |
| BCL-XL -R      |                                        | AAAGCTCTGATACGCTGTCC       |         |                    |
| BAX -F         | BCL2 Associated X, Apoptosis Regulator | CTAGAACCTAGCAGCACCAT       | 60      | 151                |
| BAX -R         |                                        | CGATCTTGGTGAAGTACTC        |         |                    |

Table S2. The primers used in IVF blastocysts for qRT-PCR

| Name of primer | Gene symbol                    | Sequence of primer (5'-3') | Tm (°C) | Fragment size (bp) |
|----------------|--------------------------------|----------------------------|---------|--------------------|
| 18S -F         | 18S ribosomal RNA              | GGACCTGACCGACTACCTCA       | 58      | 134                |
| 18S -R         |                                | CCATCTCCTGCTCGAAGTCC       |         |                    |
| SOX2 -F        | SRY-Box Transcription Factor 2 | TCCATGACCAGCTCGCAGACC      | 55      | 121                |
| SOX2 -R        |                                | TCGCCTCGGACTTGACCACT       |         |                    |
| OCT4 -F        | POU Class 5 Homeobox 1         | GTGTTTCAGCCAAACGACCAT      | 55      | 200                |
| OCT4 -R        |                                | TTGCCTCTCACTCGGTTCTC       |         |                    |
| KLF4 -F        | Kruppel Like Factor 4          | GACCTACTTACTCGCCTTGCT      | 55      | 199                |
| KLF4 -R        |                                | CCCGAACCCCAGTCAACGAA       |         |                    |
| BCL-XL -F      | BCL2 Like 1                    | ACTGAATCAGAAGCGGAAAC       | 60      | 249                |
| BCL-XL -R      |                                | AAAGCTCTGATACGCTGTCC       |         |                    |
| CASP3 -F       | Caspase 3                      | GGCGTGTGAGAAAATACCAG       | 55      | 174                |
| CASP3 -R       |                                | TTAACCCGAGTAAGAATGTG       |         |                    |

Table S3. GO terms significantly ( $q$ -value < 0.05) enriched from DEGs between early and late cleavage embryos of PA.

| GO Terms   | GO Branch          | Term Name            | $p$ -value  | $q$ -value |
|------------|--------------------|----------------------|-------------|------------|
| GO:0003676 | molecular function | nucleic acid binding | 2.74612E-05 | 0.027324   |

|            |                     |                                          |             |          |
|------------|---------------------|------------------------------------------|-------------|----------|
| GO:0044424 | cellular components | intracellular part                       | 1.06632E-10 | 6.86E-08 |
| GO:0043226 | cellular components | organelle                                | 2.69831E-05 | 0.002892 |
| GO:0043229 | cellular components | intracellular organelle                  | 2.18552E-06 | 0.000468 |
|            | cellular components | membrane-bounded                         |             |          |
| GO:0043227 |                     | organelle                                | 2.47549E-05 | 0.002892 |
| GO:0043231 | cellular components | intracellular membrane-bounded organelle | 1.85939E-06 | 0.000468 |
| GO:0005634 | cellular components | nucleus                                  | 2.56679E-05 | 0.002892 |

---
